# Supplementary material for: Cross-cultural adaptation and validation of a Resistance Training Skill Battery for use in Chinese-speaking adolescents
Source: PeerJ. 2025 Dec 15;13:e20387. doi: 10.7717/peerj.20387 (PMC12713556; doi:10.7717/peerj.20387)
Supplement: Supplemental Information 1 [file peerj-13-20387-s001.xlsx]

## Sheet: data
Number	Gender	Height(m)	Weight(kg)	BMI(kg/m2)	Handgrip strength(kg)	Timed push-ups(nunber)	Countermovement jumps(cm)	MFS	Body weight squat(points)	Push up(points)	Lunge(points)	Suspended row(points)	Standing overhead press(points)	Front support with chest touch(points)	RTSQ
1	male	1.59	45.37	17.9	27.95	18	36	3.93314	10	8	9	7	9	9	52
2	male	1.56	55.7	22.9	29.65	16	27.8	1.5696	6	6	6	4	6	9	37
3	male	1.64	60.1	22.3	25.525	15	25.8	0.282571	5	4	4	6	8	6	33
4	male	1.64	60	22.3	35.325	15	25.1	1.41666	4	2	8	7	5	9	35
5	male	1.63	66	24.8	34.925	15	27.8	2.09075	5	4	4	5	7	4	29
6	male	1.64	58.35	21.7	34.675	15	28	2.11094	7	8	7	4	7	8	41
7	male	1.47	43.55	20.2	25.975	16	30	2.04857	6	8	6	6	10	10	46
8	male	1.5	43.35	19.3	26.8	13	27.1	0.423461	6	8	8	6	6	6	40
9	male	1.51	40.11	17.6	28.3	16	37	3.86827	10	8	10	8	8	10	54
10	male	1.64	84.83	31.5	41.05	19	23.4	2.49457	5	2	2	5	8	5	27
11	male	1.715	46.3	15.7	27.1	17	28.7	1.65897	7	6	6	8	8	7	42
12	male	1.7	66.3	22.9	40.175	17	24.2	2.21041	5	2	2	7	8	5	29
13	male	1.41	33	16.6	19.225	13	29	-0.0866871	7	6	8	6	10	5	42
14	male	1.675	53.85	19.2	33.375	14	23.1	0.423221	2	4	5	3	7	3	24
15	male	1.37	36.03	19.2	18.025	16	26.8	-0.269261	8	6	3	2	7	4	30
16	male	1.525	43.82	18.8	26.05	8	23.9	-1.49514	6	3	6	2	7	2	26
17	male	1.635	47.71	17.8	30.725	7	29.1	0.347269	10	8	7	3	7	2	37
18	male	1.58	54.24	21.7	22.825	15	24	-0.567281	6	3	4	6	6	4	29
19	male	1.535	43.61	18.5	19.25	12	28.5	-0.409033	3	8	8	4	6	2	31
20	male	1.59	53.48	21.2	20.6025	20	27.4	1.62224	8	2	2	6	6	7	31
21	male	1.55	60.85	25.3	26.5	1	22.4	-3.17512	4	2	5	6	4	4	25
22	male	1.54	53.17	22.4	19.675	8	22.1	-2.84106	3	2	7	4	4	3	23
23	male	1.755	86.85	28.2	45.35	9	28.9	2.64926	6	3	5	3	8	9	34
24	male	1.43	33.88	16.6	18.55	15	30	0.473639	10	6	10	4	5	2	37
25	male	1.65	48.38	17.8	28.125	10	20.8	-1.66923	5	2	5	5	4	2	23
26	male	1.545	45.63	19.1	13.975	10	24.6	-2.55454	8	2	5	4	6	3	28
27	male	1.76	63	20.3	45.125	18	30	4.63352	8	8	7	4	6	5	38
28	male	1.69	60.9	21.3	36.025	18	27	2.59617	4	4	7	1	6	6	28
29	male	1.7	52.7	18.2	39.875	16	35	4.89139	8	6	10	7	8	10	49
30	male	1.78	59.3	18.7	40.6	15	34	4.5287	10	4	7	7	8	7	43
31	male	1.57	45	18.3	30.7	10	29.1	0.916561	6	8	4	8	8	8	42
32	male	1.83	58	17.3	33.3	9	21	-1.10764	4	2	6	2	8	4	26
33	male	1.64	48	17.8	34.875	13	29.8	5.196	7	6	10	4	8	8	43
34	male	1.61	49	18.9	32.825	8	29.9	1.03736	8	4	8	2	10	6	38
35	male	1.64	71	26.4	39.8	13	29.7	2.87939	8	4	8	3	8	10	41
36	male	1.65	46	16.9	30.9	9	24	-0.622614	6	6	9	4	6	7	38
37	male	1.6	54	21.1	25.35	7	31	0.134087	6	4	10	8	9	8	45
38	female	1.525	40.2	17.3	24.025	18	23	-0.102296	8	4	4	6	10	4	36
39	female	1.54	48.65	20.5	32.2	11	22	-0.604682	4	3	10	5	8	6	36
40	female	1.62	48.58	18.5	30.575	8	26	-0.318046	7	6	4	8	8	10	43
41	female	1.52	48.58	21	27.95	5	25	-1.51471	7	3	6	8	8	10	42
42	female	1.495	45.06	20.2	24.575	15	20	-1.40971	5	4	5	5	7	8	34
43	female	1.445	35.1	16.8	19.1	19	24	-0.306543	8	2	8	6	9	5	38
44	female	1.56	45.91	18.9	22.175	16	23	-0.733795	8	2	5	8	7	3	33
45	female	1.47	38.32	17.7	17.625	10	21	-3.03263	7	5	6	2	8	6	34
46	female	1.48	45.61	20.8	20.15	19	26.4	3.29149	7	8	6	6	10	9	46
47	female	1.465	30.57	14.2	13.25	3	27	-3.34144	4	7	5	6	8	8	38
48	female	1.535	54.96	23.3	24.625	16	19.2	-1.4278	6	2	5	4	8	3	28
49	female	1.455	37.07	17.5	17.875	0	22	-4.63811	4	2	5	5	7	8	31
50	female	1.475	45.63	21	20.175	10	28.1	-0.773815	10	6	10	6	8	8	48
51	female	1.63	56.23	21.2	29.075	10	22.4	-1.10953	8	3	7	8	4	2	32
52	female	1.61	47	18.1	22.825	6	24	-2.28528	4	4	7	7	8	7	37
53	female	1.56	52	21.4	27.7	9	27	-0.245575	8	4	10	6	10	8	46
54	female	1.65	55	20.2	32.775	5	26.7	-0.404982	8	4	8	4	8	8	40
55	female	1.56	53	21.8	22.575	5	23	-2.77958	6	6	7	4	8	4	35
56	female	1.58	55	22	22.85	2	26	-2.50614	10	6	10	8	8	10	52
57	female	1.57	54	21.9	25.725	3	26	-1.92717	6	6	10	4	8	6	40
58	female	1.51	40	17.5	23	4	26.4	-1.99624	6	6	8	6	8	8	42
59	female	1.51	41	18	21.5	4	26	4.36586	6	6	10	6	8	9	45
60	female	1.54	49	20.7	26.225	9	26.9	-0.471643	9	4	10	6	8	6	43
61	female	1.56	44	18.1	21.45	8	27	-1.28012	8	6	9	7	8	8	46
62	female	1.56	44	18.1	18.7	3	29	-2.06644	8	5	7	4	10	6	40
63	female	1.56	48	19.7	24.575	6	28	-0.970405	7	8	8	8	8	10	49
64	female	1.55	51	21.2	29.2	8	29.3	0.386239	9	6	9	8	8	5	45
					27.368	11.2188	26.5063		10	8	10	8	10	10
					7.40825	5.23865	3.70833		2	2	2	1	4	2

## Sheet: raters
	Number	Gender	Rater1	Rater2	Rater3	Rater4	Rater5	Rater6
	1	male	43	47	53	49	50	53
	2	male	24	26	38	39	38	37
第一组	3	male	31	30	34	35	33	33
	4	male	38	37	34	43	42	35
	5	male	27	28	31	28	27	29
	6	male	33	33	43	42	41	41
	7	male	40	42	45	45	46	46
	8	male	33	32	44	39	37	40
	9	male	35	34	50	41	41	36
	10	male	34	31	33	33	36	36
	11	male	41	40	44	51	53	43
	12	male	30	32	34	33	35	42
第二组	13	male	42	45	40	51	50	54
	14	male	21	23	27	34	33	27
	15	male	28	30	32	29	26	42
	16	male	33	28	32	41	41	29
	17	male	33	30	42	40	41	42
	18	male	36	33	31	39	35	24
	19	male	33	30	32	40	42	30
	20	male	37	32	32	33	33	26
	21	male	31	30	33	34	37	37
	22	male	28	28	27	33	37	34
第三组	23	male	31	34	34	33	35	38
	24	male	35	36	38	41	38	33
	25	male	35	33	21	39	36	29
	26	male	27	26	36	34	32	31
	27	male	38	38	40	38	39	31
	28	male	25	23	33	27	29	25
	29	male	43	41	50	49	47	23
	30	male	40	41	41	44	48	34
	31	male	38	39	41	42	43	37
	32	male	26	23	29	27	28	23
	33	male	40	41	44	42	43	34
	34	male	35	35	42	38	39	46
第四组	35	male	39	34	41	42	43	38
	36	male	33	31	39	38	39	28
	37	male	42	41	43	43	44	31
	38	female	33	34	39	40	41	48
	39	female	32	30	37	44	47	32
	40	female	39	35	42	45	47	28
	41	female	30	31	40	48	49	40
	42	female	35	32	36	44	47	26
	43	female	41	41	39	47	42	49
	44	female	41	43	39	44	44	44
	45	female	27	30	37	41	42	40
	46	female	39	35	44	47	48	46
	47	female	32	31	42	41	41	39
	48	female	31	31	33	37	38	37
	49	female	30	32	38	33	38	42
	50	female	44	42	45	47	44	26
第五组	51	female	40	41	36	41	41	43
	52	female	35	34	36	40	41	38
	53	female	42	42	48	46	48	42
	54	female	36	37	42	38	34	38
	55	female	35	32	39	36	36	45
	56	female	43	42	48	52	51	52
	57	female	40	41	42	41	43	41
	58	female	38	32	43	42	44	42
	59	female	43	43	46	43	46	45
	60	female	40	41	47	43	41	43
	61	female	45	45	45	48	43	49
	62	female	37	36	45	40	37	40
	63	female	45	41	48	48	47	50
	64	female	45	44	46	43	42	46
第八组
